# Supplementary material for: Photovoice-based Crowdsourcing: A step towards managing waste and improving environment and health
Source: Research Square preprint supplement (doi:10.21203/rs.3.rs-7264623/v1), 2025-08-04
Supplement: Supplementary file 1 [file 10460af28bf2d97c99c5b63a.docx]

**Table 2: Coding tree**

| **Themes** | **Sub-themes** | **Categories** | |
| --- | --- | --- | --- |
| Waste management awareness and its significance in tackling poor segregation | WM awareness needs among people | **Awareness generation by providers**   - Spreading awareness among people by government and municipality and making NGOs for teaching waste recycling - Informing about consequences of negligence and waste mixing - Pictures on dustbins - Increasing awareness of waste collectors and improving their health. |
| **Awareness about sustainable waste management**   - Valuing waste and motivating for reuse as resources are rare - Generating energy and making innovative products such as eco-bricks made from recycled plastic. - Income from waste such as biomass waste - Waste segregation for sustainable living |
| Spectrum of waste management practices | **Commonly performed unfavourable practices**   - Waste water mixed flowing water and waste dumped in drains - Waste mixing and poor segregation - Waste littering and open dumping of radioactive waste - Plastic in the environment - No installation of dustbins outside shops |
| **Convenient practices performed by people**   - Use of colour-coded dustbins and separate dry and wet waste - Taking ownership of own waste - Segregation at source of generation - Two bin system in the societies and their use |
| Waste management principles to be followed for sustainable waste management | **Community-led Sustainable waste management methods**   - Composting, reuse, recycling, refusing, and reducing - Inculcating habits in students |
| **Innovation in sustainable waste management methods**   - Using biomass waste in making products. - Using in industries such as cement and bricks - Innovation with waste by making bricks using plastic |
| Health consequences of inappropriate waste segregation on ecosystem | Downside of poor waste management on animal health | **Internal infections**   - Indigestion and starvation - Microplastic in tissues and organs of fishes - Internal wounds - Hypoxic environment for aquatic animals |
| **External infections**   - Cuts due to sharp objects - Injuries due to chemical and hazardous waste |
| Public health disease concerns rooting from inappropriate waste management | **Infectious diseases and sources**   - Fly-borne diseases, dengue and Healthcare associated infections, cuts - High risk of infection among children - Breeding of microorganisms in stagnate drains |
| **Non-infectious diseases and sources**   - Microplastic contaminated food - Lung cancer |
| Impact on the environmental health | **Climate change**   - Global warming due to impaired recycling process - High carbon footprint |
| **Air Pollution**   - All type of waste is burned - Radioactive waste |
| **Land Pollution**   - Waste burden on landfills - Soil contamination due to waste - Construction & demolition waste - Plastic in environment - Reduced aesthetic value |
| **Water Pollution**   - Water stagnation - Algal blooms/eutrophication - Microplastic - Waste into flowing water - Vulnerable aquatic bodies |
| Understanding the role of community and service providers in improving waste segregation and management | Collective efforts of government and community can pave a path towards better waste management | **People-led efforts**   - Motivating and persuading for waste segregation - Supporting and learning from each other in cleaning environment - Bottom-up approach - Dustbins installation - Picking littered waste - Encouraging children in developing behaviour and attitude for waste segregation |
| **Efforts of government and waste workers**   - Motivating people to use separate dustbins - Supporting and celebrating waste collectors and reducing their burden - Cleaning initiatives should be taken |
| Behaviour development for waste management | **Inculcating pro-environmental behaviour**   - Developing non-negligence behaviour - Inculcate disposal habits at early age - Learning from others and active engagement of society in environment cleaning is desired |
| **Positive attitude towards waste management**   - Respectable behaviour towards waste collectors. - Dry and wet waste separation ownership should be taken - Actively participate in government cleaning initiatives |
